# Supplementary material
Source: publisher figshare collection journal article supplement (https://gsajournals.figshare.com/articles/dataset/_/6936683)
Supplement: Supplementary file 1 [file 1]

## Sheet: Table S4
Table S4: Media recipes
Drop out (DO) mix -UL				Drop out (DO) mix -ULR
Adenine	0.5g			Adenine	0.5g
Aspartate	2.0g			Aspartate	2.0g
Arginine	2.0g			Glutamate	2.0g
Glutamate	2.0g			Histidine	2.0g
Histidine	2.0g			Lysine	2.0g
Lysine	2.0g			Methionine	2.0g
Methionine	2.0g			Phenylalanine	2.0g
Phenylalanine	2.0g			Serine	2.0g
Serine	2.0g			Threonine	2.0g
Threonine	2.0g			Tryptophan	2.0g
Tryptophan	2.0g			Tyrosine	2.0g
Tyrosine	2.0g			Valine	2.0g
Valine	2.0g
SC -UL +2% glucose* (1 L)				SC -UL +5% glycerol (1 L)
YNB w/o AA and NH4SO4		1.74g		YNB w/o AA and NH4SO4		1.74g
DO -UL mix		0.90g		DO -UL mix		0.90g
NH4SO4		5.0g		NH4SO4		5.0g
glucose		20.0g		glycerol 80%		62.5ml
adjust volume to		1000ml		adjust volume to	1000 ml	1000ml
*add agar for solid media		20.0g
SC -UL +5% galactose (1 L)				SC -ULR +2% glucose* (1 L)
YNB w/o AA and NH4SO4		1.74g		YNB w/o AA and NH4SO4		1.74g
DO -UL mix		0.90g		DO -ULR mix		0.90g
NH4SO4		5.0g		NH4SO4		5.0g
adjust volume to	1000 ml	875ml		glucose		20.0g
add galactose 40 %		125ml		adjust volume to		1000ml
				*add agar for solid media		20.0g
SC -ULR +2% glucose + Can* (1 L)
YNB w/o AA and NH4SO4		1.74g
DO -ULR mix		0.90g		Autoclave (15 mins 121 °C) = ------------
NH4SO4		5.0g
glucose		20.0g		All reagents puchased from Bioshop,
adjust volume to		1000ml		except for Canavanine (Sigma-Aldrich)
Canavanine (50mg/ml)		1ml
*add agar for solid media		20.0g
