# Supplementary material
Source: publisher figshare collection journal article supplement (https://gsajournals.figshare.com/articles/dataset/_/6936683)
Supplement: Supplementary file 2 [file 1]

|                    |   |                                          |
|--------------------|---|------------------------------------------|
| ADE1 target region |   | ---ATGTCAATTACGAAGACTGAACT <u>TGG</u> AC |
| ADE1 guide         |   | -----GTCAATTACGAAGACTGAACT-----          |
| White<br>(S2L)     | [ | ATAATGTTAATTACGAAGACTGAACTGGAC           |
|                    |   | ATAATGTTAATTACGAAGACTGAACTGGAC           |
| Red<br>(S2*)       | [ | ATAATGTGAATTACGAAGACTGAACTGGAC           |
|                    |   | ATAATGTGAATTACGAAGACTGAACTGGAC           |
|                    |   | ATAATGTGAATTACGAAGACTGAACTGGAC           |
|                    |   | ATAATGTAAATTACGAAGACTGAACTGGAC           |
|                    |   | ATAATGTGAATTACGAAGACTGAACTGGAC           |
|                    |   | ATAATGTGAATTACGAAGACTGAACTGGAC           |

**Figure S1 Different Target-AID mutations result in different phenotypes.** The target site within ADE1 was sequenced for colonies from 4 independent mutagenesis experiments. As expected, only the mutations creating a premature stop codon result in LOF, while the S2L substitution does not affect function in a detectable manner.
