# Supplementary material
Source: publisher figshare collection journal article supplement (https://gsajournals.figshare.com/articles/dataset/_/6936683)
Supplement: Supplementary file 4 [file 1]

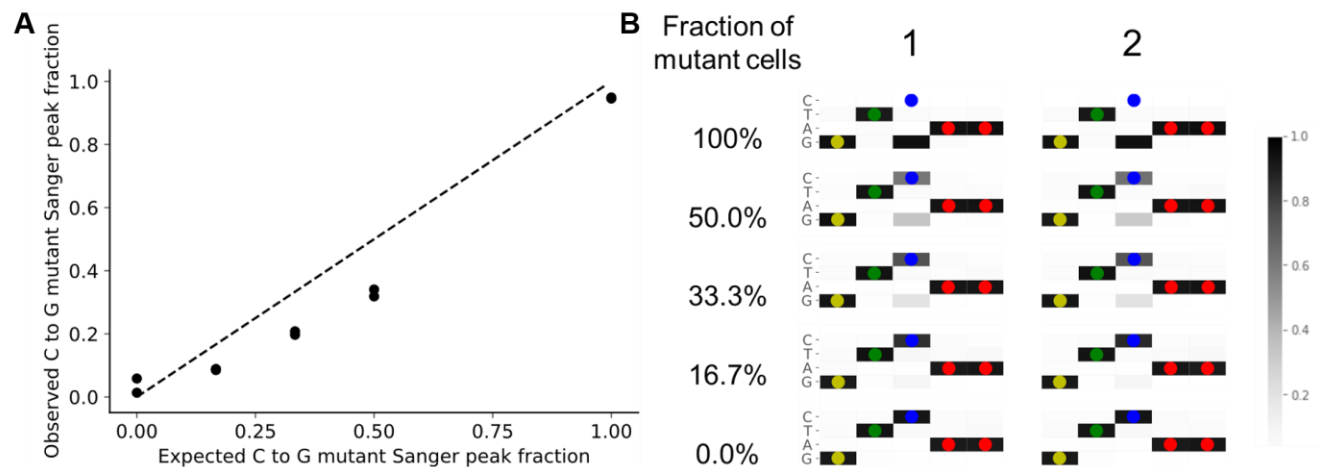

**Figure S2 Sanger chromatograph peak intensities reflect allelic frequencies a)**

Sanger peak intensity from wild-type and mutant cells pools mixed in different proportions strongly correlate. The relationship is not 1:1 ratios however, which results in a slight underestimation of mutation frequencies. b) Heat map representation of the chromatographs used to calculate peak fractions. The rectangles represent peak fractions for each nucleotide along the sequence, while the colored dots represent the wild-type sequence from *ADE1*.
